# Supplementary material for: From bench to bar side: Evaluating thered wine storage lesion
Source: publisher site journal article supplement (doi:10.1515/biol-2021-0089), 2021-01-01
Supplement: Supplementary file 1 [file biol-2021-0089_sm.pdf]

## Supplementary material

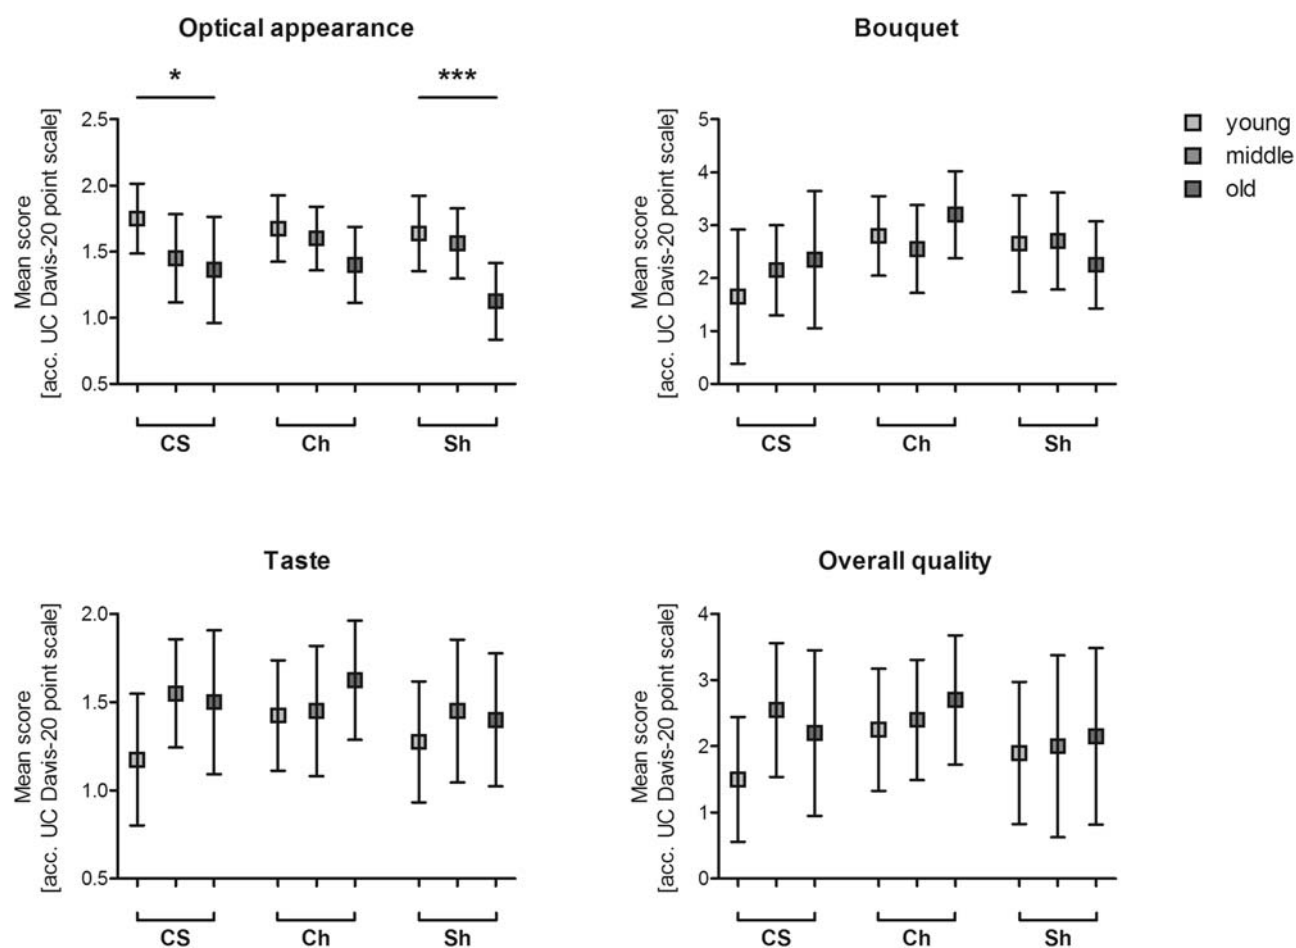

**Figure S1:** Effect of red wine age on culinary aspects. A blind tasting was performed including 3 wine experts and 7 laypersons. Cabernet Sauvignon (CS), Chianti (Ch) and Shiraz (Sh) of three different vintages were presented separately to the tasters in a random order. Red wines were assessed using the University of California at Davis 20 Point Scale System (UC Davis-20), allowing a total score for each wine from 2 to 20. Young wines performed better than the middle-aged and old variants in terms of optical appearance (composite parameter from clarity and color), while they were downgraded regarding bouquet, taste and overall quality. Mean  $\pm$  SD,  $n = 10$ ; one-way ANOVA; \* $p < 0.05$ , \*\*\* $p < 0.005$ .
